# Supplementary material
Source: PubMed Central journal article supplement (PMC4230341)
Supplement: NIHMS603795-supplement-001244_-_Supplemental_Material.pdf [file NIHMS603795-supplement-001244_-_Supplemental_Material.pdf]

## SUPPLEMENTAL MATERIAL

Supplemental Figure 1. Flow chart of participants excluded at baseline, Atherosclerosis Risk in Communities Study (ARIC), 1987-1989.

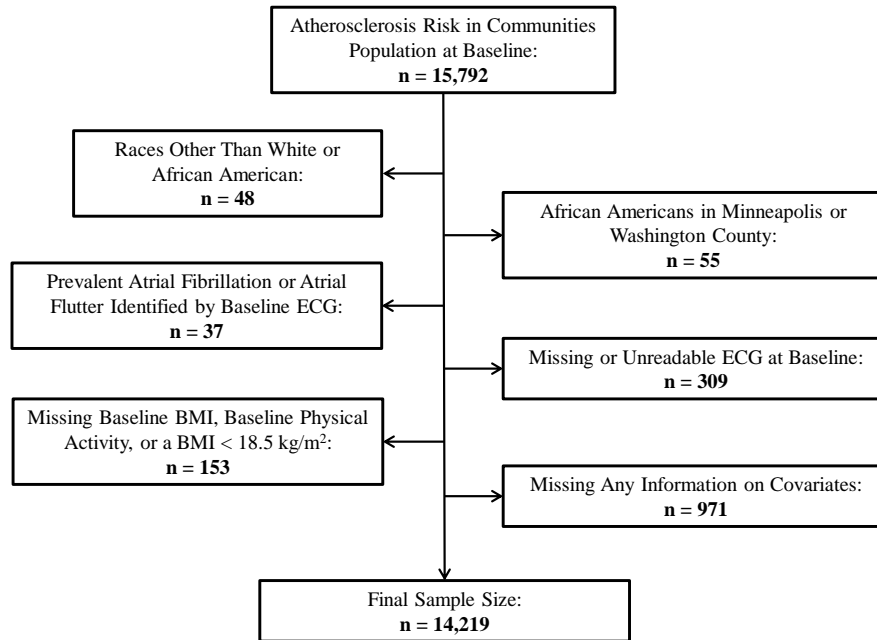

Total Initial Sample Size (After exclusions): 14,219

Total AF Cases: 1,775

Supplemental Figure 2. Association of body mass index with incidence of atrial fibrillation in men presented as hazard ratio (solid line) and 95% confidence intervals (shaded area). Results from Cox proportional hazards model using restricted cubic splines, adjusted for age and race. Median value of body mass index was considered the reference (HR=1). The histograms represent the frequency distribution of the body mass index in the study sample.

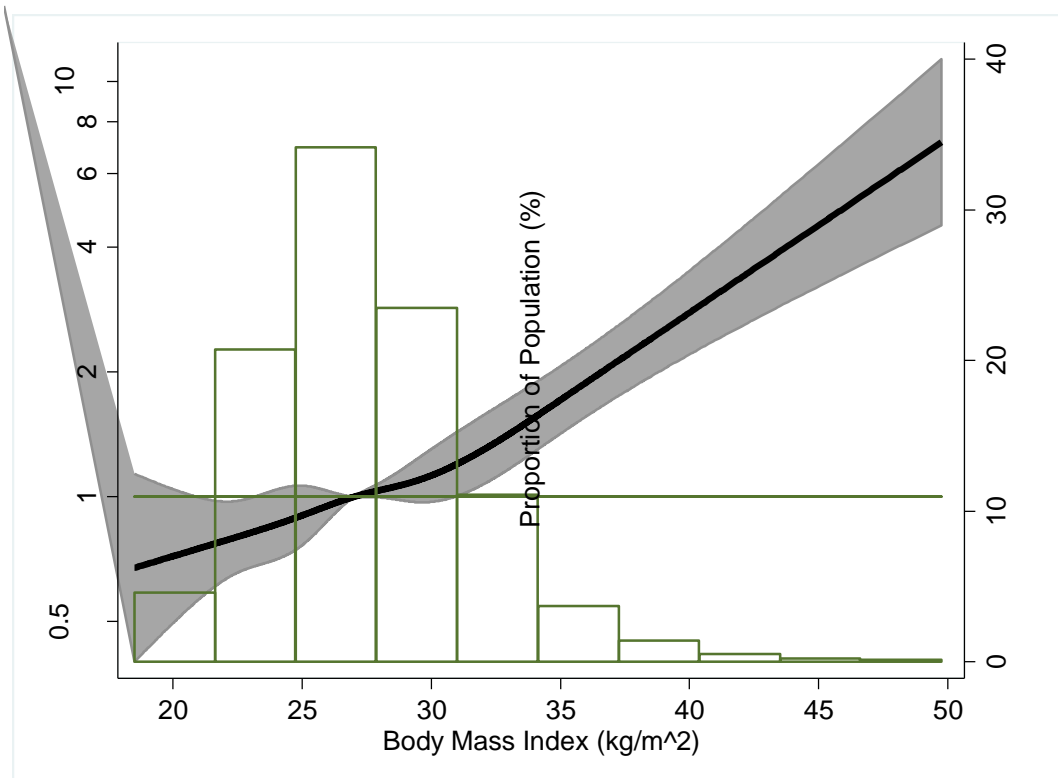

Supplemental Figure 3. Association of body mass index with incidence of atrial fibrillation in women presented as hazard ratio (solid line) and 95% confidence intervals (shaded area). Results from Cox proportional hazards model using restricted cubic splines, adjusted for age and race. Median value of body mass index was considered the reference (HR=1). The histograms represent the frequency distribution of the body mass index in the study sample.

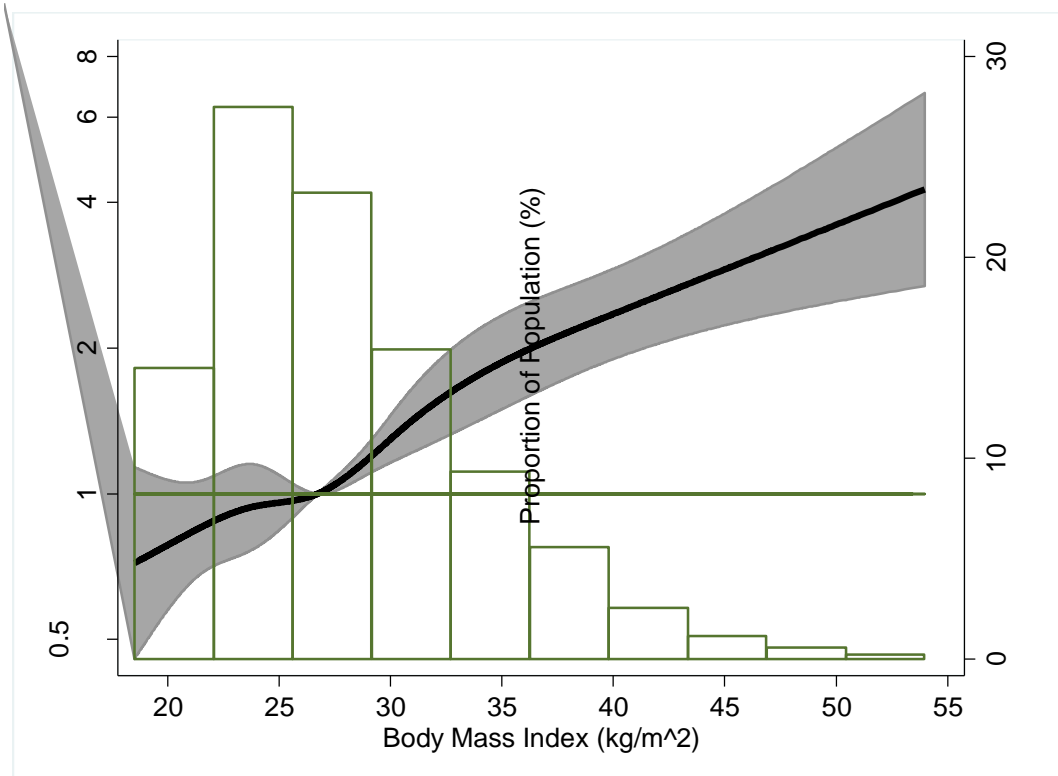

Supplemental Figure 4. Association of waist circumference with incidence of atrial fibrillation in men presented as hazard ratio (solid line) and 95% confidence intervals (shaded area). Results from Cox proportional hazards model using restricted cubic splines, adjusted for age and race. Median value of waist circumference was considered the reference (HR=1). The histograms represent the frequency distribution of the waist circumference in the study sample.

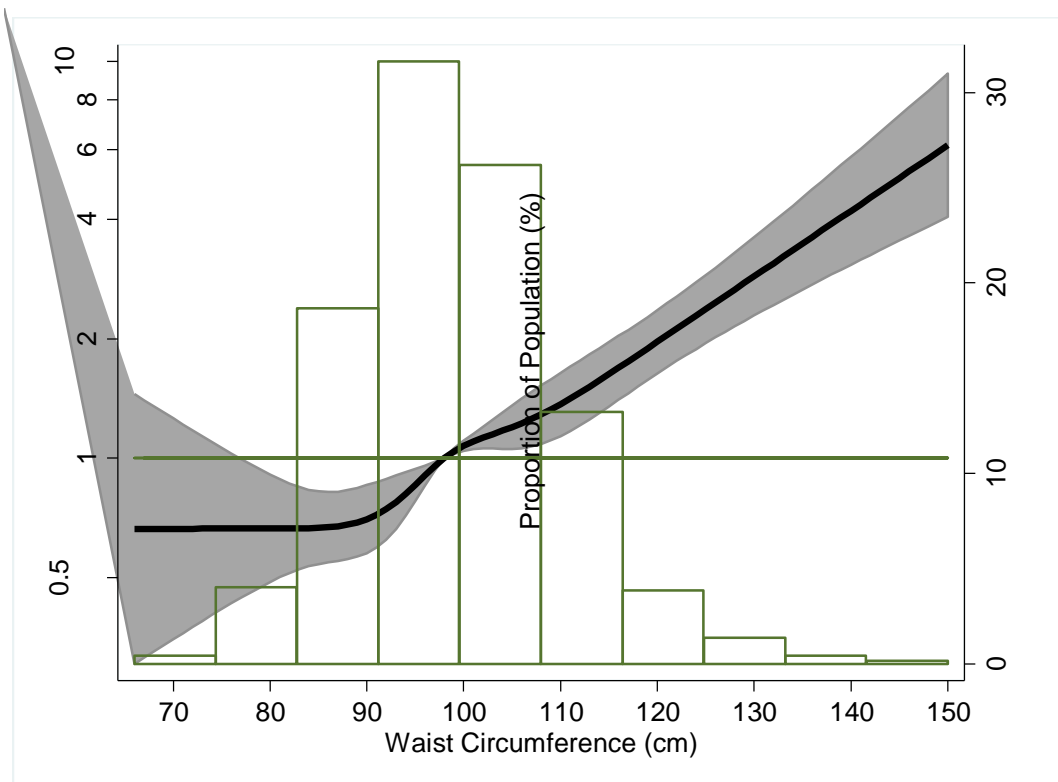

Supplemental Figure 5. Association of waist circumference with incidence of atrial fibrillation in women presented as hazard ratio (solid line) and 95% confidence intervals (shaded area). Results from Cox proportional hazards model using restricted cubic splines, adjusted for age and race. Median value of waist circumference was considered the reference (HR=1). The histograms represent the frequency distribution of the waist circumference in the study sample.

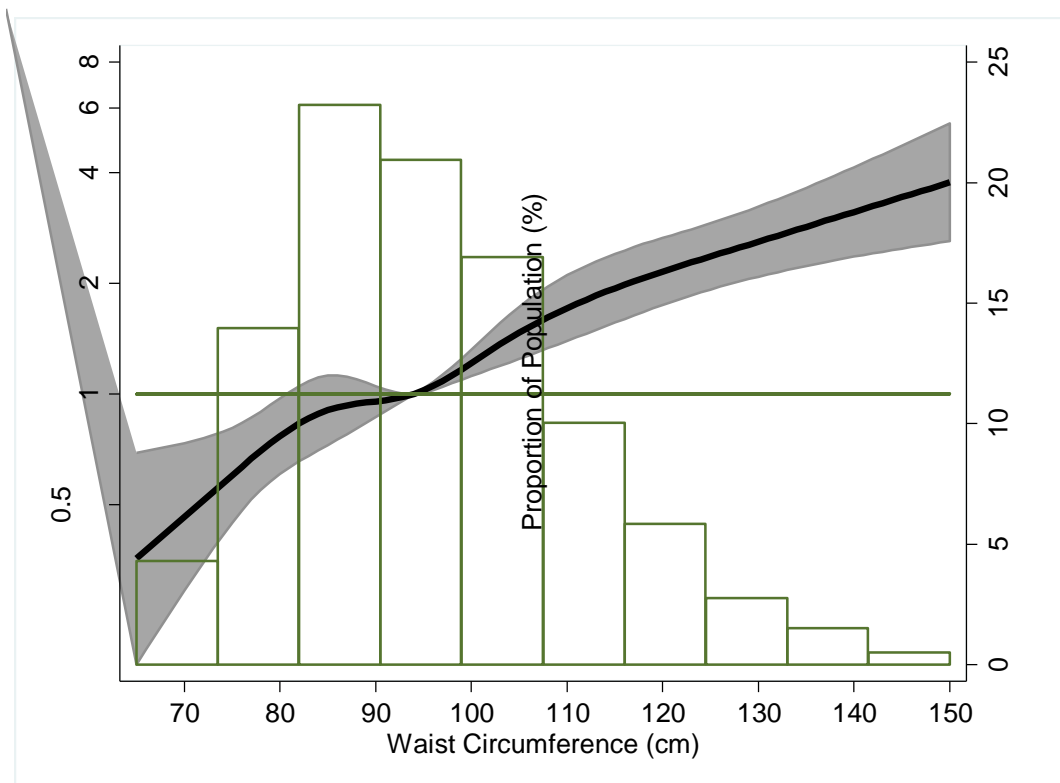

Supplemental Figure 6. Association of physical activity (moderate + vigorous) with incidence of atrial fibrillation in men presented as hazard ratio (solid line) and 95% confidence intervals (shaded area). Results from Cox proportional hazards model using restricted cubic splines, adjusted for age and race. Median value of physical activity was considered the reference (HR=1). The histograms represent the frequency distribution of the physical activity in the study sample.

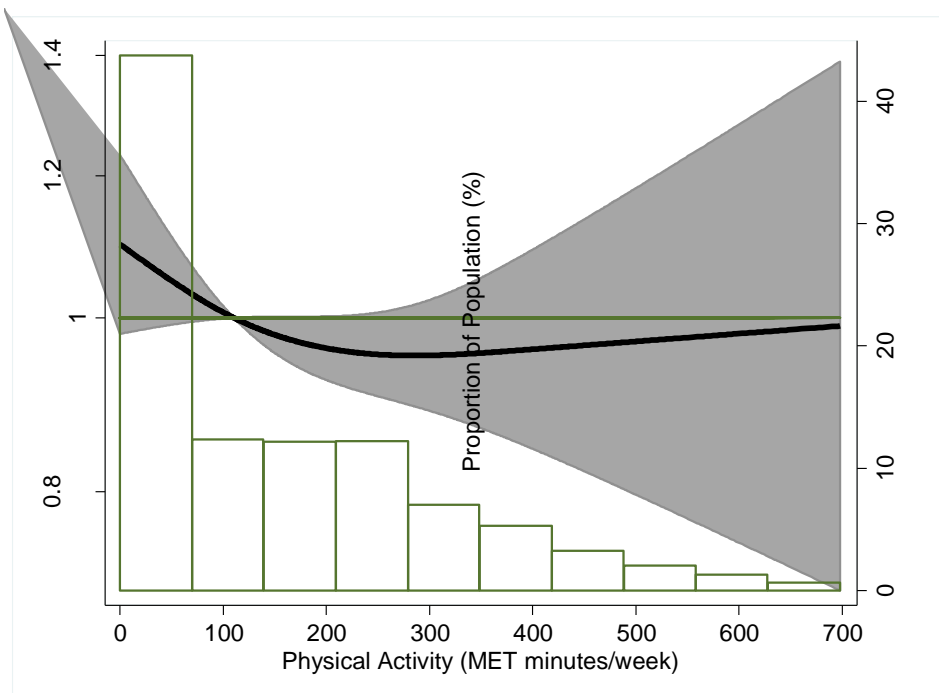

Supplemental Figure 7. Association of physical activity (moderate + vigorous) with incidence of atrial fibrillation in women presented as hazard ratio (solid line) and 95% confidence intervals (shaded area). Results from Cox proportional hazards model using restricted cubic splines, adjusted for age and race. Median value of physical activity was considered the reference (HR=1). The histograms represent the frequency distribution of the physical activity in the study sample.

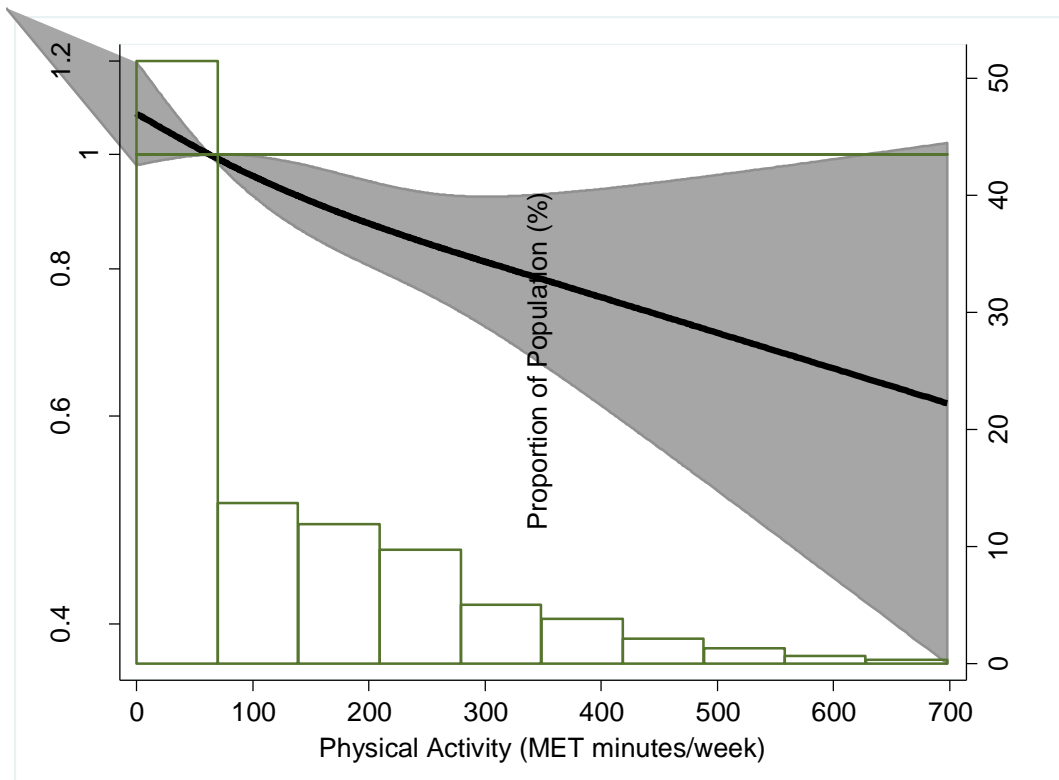



Supplemental Table 1. Mean body mass index (BMI) and mean metabolic equivalent (MET)-minutes for category of weight in men and women in the Atherosclerosis Risk in Communities Study (ARIC), 1987 – 2009

|       | Level of Physical Activity | N    | AF Cases |                          | Body mass index category                 |                                           |                                    |
|-------|----------------------------|------|----------|--------------------------|------------------------------------------|-------------------------------------------|------------------------------------|
|       |                            |      |          |                          | Normal<br>(18.5-24.9 kg/m <sup>2</sup> ) | Overweight<br>(25-29.9kg/m <sup>2</sup> ) | Obese<br>(≥ 30 kg/m <sup>2</sup> ) |
| Men   | Poor                       | 2218 | 342      | BMI (kg/m <sup>2</sup> ) | 22.9                                     | 27.3                                      | 33.8                               |
|       |                            |      |          | MET-minutes              | 0                                        | 0                                         | 0                                  |
|       | Intermediate               | 1420 | 210      | BMI (kg/m <sup>2</sup> ) | 23.1                                     | 27.4                                      | 33.0                               |
|       |                            |      |          | MET-minutes              | 80.7                                     | 81.7                                      | 80.9                               |
|       | Ideal                      | 2807 | 435      | BMI (kg/m <sup>2</sup> ) | 23.1                                     | 27.2                                      | 32.8                               |
|       |                            |      |          | MET-minutes              | 311.8                                    | 302.4                                     | 302.6                              |
| Women | Poor                       | 3109 | 335      | BMI (kg/m <sup>2</sup> ) | 22.5                                     | 27.4                                      | 35.7                               |
|       |                            |      |          | MET-minutes              | 0                                        | 0                                         | 0                                  |
|       | Intermediate               | 2064 | 215      | BMI (kg/m <sup>2</sup> ) | 22.5                                     | 27.4                                      | 35.1                               |
|       |                            |      |          | MET-minutes              | 81.9                                     | 79.3                                      | 76.4                               |
|       | Ideal                      | 2601 | 238      | BMI (kg/m <sup>2</sup> ) | 22.4                                     | 27.2                                      | 34.5                               |
|       |                            |      |          | MET-minutes              | 297.2                                    | 285.5                                     | 276.3                              |

Supplemental Table 2.

Most common forms of physical activity in men and women in the Atherosclerosis Risk in Communities Study (ARIC), 1987 - 2009

| <b>MEN</b>                      | <b>n</b> | <b>WOMEN</b>                       | <b>n</b> |
|---------------------------------|----------|------------------------------------|----------|
| Walking Briskly                 | 941      | Walking Briskly                    | 1475     |
| Gardening/Yard Work             | 685      | Walking for Pleasure               | 572      |
| Walking for Pleasure            | 557      | Gardening/Yard Work                | 351      |
| Golfing - Using Cart            | 357      | Floor Exercise                     | 291      |
| Golfing - Walking & Carry Clubs | 352      | Bicycling <10 mph                  | 290      |
| Bicycling ≥10 mph               | 271      | Bicycling ≥10 mph                  | 261      |
| Fishing from Bank or Boat       | 206      | Bowling                            | 219      |
| Bowling                         | 194      | Dancing, Aerobic (low to moderate) | 205      |
| Mowing Lawn                     | 189      | Swim, Recreational                 | 188      |
| Hunting                         | 185      | Tennis                             | 156      |

Supplemental Table 3. Hazard ratios (95% confidence intervals) for the association between relative weight change during follow up with risk of atrial fibrillation (AF) in men and women, Atherosclerosis Risk in Communities Study (ARIC), 1996 – 2009

|       |             | Weight change during follow-up* |                  |      |                  |                  | P <sub>quadratic trend</sub> ** |
|-------|-------------|---------------------------------|------------------|------|------------------|------------------|---------------------------------|
|       |             | >5% loss                        | 0-5% loss        | Ref  | 5-9.9% gain      | ≥10% gain        |                                 |
| Men   | n           | 543                             | 864              | 1514 | 956              | 623              |                                 |
|       | AF cases    | 88                              | 98               | 154  | 113              | 87               |                                 |
|       | HR (95% CI) | 1.52 (1.16-1.99)                | 1.01 (0.79-1.31) | 1.00 | 1.33 (1.04-1.70) | 1.61 (1.24-2.11) | <0.0001                         |
| Women | n           | 702                             | 887              | 1463 | 1223             | 1464             |                                 |
|       | AF cases    | 84                              | 86               | 108  | 101              | 107              |                                 |
|       | HR (95% CI) | 1.45 (1.08-1.93)                | 1.24 (0.93-1.64) | 1.00 | 1.24 (0.94-1.62) | 1.19 (0.90-1.55) | 0.03                            |

Ref = reference group that included individuals who gained 0-4.9% weight; \*Adjusted for age, race, study site, education, income, prior cardiovascular disease, height, cigarette smoking, physical activity, and alcohol consumption. \*\*Significant sex interaction (p = 0.01)

Supplemental Table 4. Association between sex-specific tertiles of physical activity level with risk of atrial fibrillation (AF) in men and women in the Atherosclerosis Risk in Communities Study (ARIC), 1987 - 2009

|             | N            | Physical activity level tertiles |                  |                  | P <sub>trend</sub> ** |
|-------------|--------------|----------------------------------|------------------|------------------|-----------------------|
|             |              | Low                              | Middle           | High             |                       |
| Full Cohort | n            | 5327                             | 4152             | 4720             |                       |
|             | AF Cases     | 677                              | 494              | 604              |                       |
|             | HR (95% CI)* | 1.00                             | 0.95 (0.84-1.07) | 0.89 (0.80-1.00) | 0.06                  |

\*Adjusted for age, race, sex, study site, education, income, prior cardiovascular disease, cigarette smoking, height, and alcohol consumption. \*\*Linear trend by physical activity group as an ordinal variable.

Non-significant sex interaction: 0.51

Supplemental Table 5. Impact of sex-specific tertiles of physical activity on the association between body mass index and overweight and obesity with risk of atrial fibrillation (AF) in men and women in the Atherosclerosis Risk in Communities Study (ARIC), 1987 – 2009

| PA Tertile |        | Body mass index category                 |                                           |                                    | P <sub>trend</sub> * |         |
|------------|--------|------------------------------------------|-------------------------------------------|------------------------------------|----------------------|---------|
|            |        | Normal<br>(18.5-24.9 kg/m <sup>2</sup> ) | Overweight<br>(25-29.9kg/m <sup>2</sup> ) | Obese<br>(≥ 30 kg/m <sup>2</sup> ) |                      |         |
| Men        | Low    | N                                        | 598                                       | 1020                               | 600                  | <0.0001 |
|            |        | AF cases                                 | 60                                        | 149                                | 133                  |         |
|            |        | HR (95% CI)                              | 1.00                                      | 1.45 (1.07-1.97)                   | 2.56 (1.86-3.50)     |         |
|            | Middle | N                                        | 576                                       | 1034                               | 471                  |         |
|            |        | AF cases                                 | 72                                        | 152                                | 92                   |         |
|            |        | HR (95% CI)                              | 1.00                                      | 1.22 (0.92-1.62)                   | 1.88 (1.37-2.58)     |         |
|            | High   | N                                        | 597                                       | 1112                               | 437                  |         |
|            |        | AF cases                                 | 85                                        | 171                                | 73                   |         |
|            |        | HR (95% CI)                              | 1.00                                      | 1.18 (0.90-1.53)                   | 1.40 (1.02-1.94)     |         |
| Women      | Low    | N                                        | 868                                       | 994                                | 1247                 | 0.04    |
|            |        | AF cases                                 | 71                                        | 84                                 | 180                  |         |
|            |        | HR (95% CI)                              | 1.00                                      | 1.04 (0.75-1.44)                   | 1.90 (1.42-2.56)     |         |
|            | Middle | N                                        | 838                                       | 640                                | 596                  |         |
|            |        | AF cases                                 | 71                                        | 56                                 | 85                   |         |
|            |        | HR (95% CI)                              | 1.00                                      | 1.02 (0.71-1.45)                   | 1.98 (1.41-2.78)     |         |
|            | High   | N                                        | 1173                                      | 867                                | 551                  |         |
|            |        | AF cases                                 | 85                                        | 78                                 | 78                   |         |
|            |        | HR (95% CI)                              | 1.00                                      | 1.19 (0.87-1.64)                   | 2.02 (1.46-2.80)     |         |

Reference group = normal weight (18.5 < 24.9 kg/m<sup>2</sup>); Adjusted for age, race, study site, education, income, prior cardiovascular disease, height, cigarette smoking, and alcohol consumption. \*Linear trend by body mass index group as an ordinal variable. HR = hazard ratios (95% confidence intervals).

Supplemental Table 6. Impact of sex-specific tertiles of physical activity level on the association between waist circumference with risk of atrial fibrillation (AF) in men in the Atherosclerosis Risk in Communities Study (ARIC), 1987 - 2009

|     | Physical activity level |             | Waist circumference* |                  |                  |                  | P <sub>trend</sub> ** |
|-----|-------------------------|-------------|----------------------|------------------|------------------|------------------|-----------------------|
|     |                         |             | ≤92 (Ref)            | 93-98            | 99-105           | ≥106             |                       |
| Men | Low                     | n           | 567                  | 486              | 551              | 614              |                       |
|     |                         | AF cases    | 45                   | 59               | 97               | 141              |                       |
|     |                         | HR (95% CI) | 1.00                 | 1.54 (1.04-2.28) | 2.34 (1.63-3.36) | 3.16 (2.22-4.49) | <0.0001               |
|     | Middle                  | n           | 542                  | 512              | 527              | 500              |                       |
|     |                         | AF cases    | 59                   | 61               | 89               | 107              |                       |
|     |                         | HR (95% CI) | 1.00                 | 0.94 (0.66-1.36) | 1.37 (0.98-1.91) | 1.83 (1.32-2.53) | 0.001                 |
|     | High                    | n           | 591                  | 579              | 531              | 445              |                       |
|     |                         | AF cases    | 71                   | 86               | 85               | 87               |                       |
|     |                         | HR (95% CI) | 1.00                 | 1.22 (0.89-1.68) | 1.18 (0.86-1.63) | 1.63 (1.19-2.25) | <0.0001               |

\*Adjusted for age, race, study site, education, income, prior cardiovascular disease, height, cigarette smoking, and alcohol consumption\*\*Linear trend by waist circumference group as an ordinal variable. P for interaction between physical activity level and waist circumference on risk of AF p = 0.11 (no interaction in women p = 0.89)

Supplemental Table 7. Impact of level of physical activity on the association between relative weight change during follow up with risk of atrial fibrillation (AF) in men and women, Atherosclerosis Risk in Communities Study (ARIC), 1996 – 2009

|       | Physical activity level |             | Weight change during follow-up* |                  |      |                  |                  | P <sub>interaction</sub> |
|-------|-------------------------|-------------|---------------------------------|------------------|------|------------------|------------------|--------------------------|
|       |                         |             | >5% loss                        | 0-5% loss        | Ref. | 5-9.9% gained    | ≥10% gained      |                          |
| Men   | Poor                    | n           | 193                             | 254              | 445  | 317              | 224              | 0.71                     |
|       |                         | AF cases    | 33                              | 26               | 48   | 37               | 29               |                          |
|       |                         | HR (95% CI) | 1.66 (1.05-2.63)                | 0.81 (0.50-1.31) | 1.00 | 1.20 (0.78-1.84) | 1.36 (0.85-2.17) |                          |
|       | Intermediate            | n           | 114                             | 197              | 371  | 214              | 136              |                          |
|       |                         | AF cases    | 16                              | 21               | 40   | 19               | 23               |                          |
|       |                         | HR (95% CI) | 1.28 (0.71-2.31)                | 0.97 (0.57-1.65) | 1.00 | 0.95 (0.55-1.66) | 1.90 (1.12-3.22) |                          |
|       | Ideal                   | n           | 236                             | 413              | 698  | 425              | 263              |                          |
|       |                         | AF cases    | 39                              | 51               | 66   | 57               | 35               |                          |
|       |                         | HR (95% CI) | 1.50 (1.00-2.26)                | 1.21 (0.84-1.75) | 1.00 | 1.63 (1.14-2.32) | 1.74 (1.15-2.65) |                          |
| Women | Poor                    | n           | 305                             | 360              | 516  | 439              | 508              | 0.96                     |
|       |                         | AF cases    | 38                              | 40               | 36   | 40               | 39               |                          |
|       |                         | HR (95% CI) | 1.63 (1.02-2.58)                | 1.48 (0.94-2.33) | 1.00 | 1.40 (0.89-2.21) | 1.24 (0.78-1.96) |                          |
|       | Intermediate            | n           | 185                             | 238              | 404  | 343              | 393              |                          |
|       |                         | AF cases    | 23                              | 23               | 31   | 31               | 34               |                          |
|       |                         | HR (95% CI) | 1.58 (0.91-2.74)                | 1.22 (0.70-2.10) | 1.00 | 1.40 (0.84-2.31) | 1.40 (0.85-2.31) |                          |
|       | Ideal                   | n           | 212                             | 289              | 543  | 441              | 563              |                          |
|       |                         | AF cases    | 23                              | 23               | 41   | 30               | 34               |                          |
|       |                         | HR (95% CI) | 1.23 (0.73-2.08)                | 0.95 (0.57-1.60) | 1.00 | 0.96 (0.60-1.55) | 0.98 (0.62-1.55) |                          |

Ref = reference group that included individuals who gained 0-4.9% weight; \*Adjusted for age, race, study site, education, income, prior cardiovascular disease, height, cigarette smoking, and alcohol consumption. HR = Hazard ratio (95% confidence interval). P for interaction = interaction between weight change and physical activity level on risk of AF.
